# Supplementary material for: Ethylene trimerisation and tetramerisation catalysts with polar-substituted diphosphinoamine ligands
Source: Royal Society of Chemistry journal article supplement (doi:10.1039/b412432d), 2005-01-01
Supplement: b412432d.pdf [file b412432d.pdf]

\*\*\*Supplementary Information\*\*\*

**Ethylene trimerisation and tetramerisation catalysts with polar-substituted  
diphosphinoamine ligands**

**Matthew J. Overett\*, Kevin Blann, Annette Bollmann, John T. Dixon, Fiona Hess, Esna Killian, Hulisani Maumela, David H. Morgan, Arno Neveling, Stephanus Otto**

*Sasol Technology (Pty) Ltd, R&D Division, 1 Klasie Havenga Road, Sasolburg 1947, South Africa. Fax: 27 (0)11 522 9696; Tel: 27 (0)16 960 5407; E-mail: [matthew.overett@sasol.com](mailto:matthew.overett@sasol.com)*

In the examples that follow all procedures were carried out under inert conditions, using pre-dried reagents. Chemicals were obtained from Sigma-Aldrich or Strem Chemicals unless stated otherwise. Methylaluminoxane (MAO) was obtained from Crompton GmbH. The molar mass of methylaluminoxane (MAO) was taken to be 58.016 g/mol, corresponding to the (CH<sub>3</sub>-Al-O) unit, in order to calculate the molar quantities of MAO required. Ethylene oligomerisation products were analysed by GC-MS and GC-FID. All solvents were percolated under nitrogen through neutral, activated alumina prior to use. NMR spectra were recorded on a Varian Mercury 400 MHz spectrometer, with samples made up in CDCl<sub>3</sub>.

The mixed heteroatomic PNP ligands were synthesised by reacting the amine and phosphine chlorides R<sub>2</sub>R<sub>3</sub>PCl as described in S.J. Dossett, A. Gillon, A.G. Orpen, J.S. Fleming, P.G. Pringle, D.F. Wass and M.D. Jones, *Chem. Commun.*, 2001, 699; M.S. Balakrishna, T.K. Prakasha and S.S. Krishnamurthy, *J. Organomet. Chem.*, 1990, **390**, 2, 203; N.A. Cooley, S.M. Green, D.F. Wass, K. Heslop, A.G. Orpen and P. Pringle, *Organometallics*, 2001, **20**, 4769. The respective phosphine chlorides R<sub>2</sub>PCl were prepared as described by T.V. Rajanbabu, T.A. Ayers, G.A. Halliday, K.K. You and J.C. Calabrese, *J. Org. Chem.*, 1997, **62**, 17, 6012. The ligands were all fully characterized; <sup>31</sup>P NMR shifts (ppm) are given in Table 1.

| <b>R<sub>2</sub>R<sub>3</sub>PCl + R<sub>4</sub>R<sub>5</sub>PCl + R<sub>1</sub>NH<sub>2</sub> → R<sub>2</sub>R<sub>3</sub>PN(R<sub>1</sub>)PR<sub>4</sub>R<sub>5</sub></b> |                                             |                                                               |                                       |
|-----------------------------------------------------------------------------------------------------------------------------------------------------------------------------|---------------------------------------------|---------------------------------------------------------------|---------------------------------------|
| <b>Ligand</b>                                                                                                                                                               | <b>Amine: (R<sub>1</sub>NH<sub>2</sub>)</b> | <b>Phosphorus Chloride:</b>                                   | <b>PNP - <sup>31</sup>P NMR (ppm)</b> |
| <b>1</b>                                                                                                                                                                    | Methylamine                                 | R <sub>2-5</sub> = 2-Methoxyphenyl                            | 51.8 (s)                              |
| <b>2</b>                                                                                                                                                                    | Methylamine                                 | R <sub>2-5</sub> = 3-Methoxyphenyl                            | 74.6 (s)                              |
| <b>3</b>                                                                                                                                                                    | Methylamine                                 | R <sub>2-5</sub> = 4-Methoxyphenyl                            | 70.5 (s)                              |
| <b>4</b>                                                                                                                                                                    | Methylamine                                 | R <sub>2-5</sub> = Phenyl                                     | 74.2 (s)                              |
| <b>5</b>                                                                                                                                                                    | Isopropylamine                              | R <sub>2-5</sub> = 4-Methoxyphenyl                            | 46.1 (br s)                           |
| <b>6</b>                                                                                                                                                                    | Isopropylamine                              | R <sub>2-5</sub> = Phenyl                                     | 50.1 (br s)                           |
| <b>7</b>                                                                                                                                                                    | Isopropylamine                              | R <sub>2,5</sub> = 1-Methoxyphenyl; R <sub>3,4</sub> = Phenyl | 50.0 – 25.0 (br m) (conformers)       |
| <b>8</b>                                                                                                                                                                    | Isopropylamine                              | R <sub>2</sub> = 1-Methoxyphenyl; R <sub>3-5</sub> = Phenyl   | 55.0 (br s), 22.0 (br m)              |
| <b>9</b>                                                                                                                                                                    | Isopropylamine                              | R <sub>2</sub> = 1-Ethylphenyl; R <sub>3-5</sub> = Phenyl     | 52.1 (br s), 35.0 (br m)              |

**Example 1. Preparation of (4-methoxyphenyl)<sub>2</sub>PN(isopropyl)P(4-methoxyphenyl)<sub>2</sub> (5)**

**1a) Preparation of N,N-Diisopropylphosphoramidate dichloride**

Diisopropylamine (70 ml, 0.50 mol) in toluene (80 ml) was added to a solution of PCl<sub>3</sub> (21.87 ml, 0.25 mol) in toluene (80 ml) at -10 °C. The mixture was stirred for two hours and then allowed to warm to room temperature. The solution was stirred for a further hour after which it was filtered through a pad of celite. The product (35 g, 68 %) was obtained after removal of the solvent. <sup>31</sup>P {H} NMR: 170 ppm

**1b) Preparation of Bis(4-methoxyphenyl) phosphorus chloride/bromide**

Magnesium turnings (9.11 g, 0.375 mol) were treated with 4-bromoanisole (9.39 ml, 75 mmol) in THF (100 ml). A vigorous reaction ensued which was cooled in an ice bath. Once the reaction had dissipated, the reaction mixture was heated under reflux for 2 hours yielding a solution of 4-methoxyphenyl magnesium bromide. This Grignard reagent was added to N,N-diisopropylphosphoramidate dichloride (6.64 ml, 36 mmol) in THF (100 ml) at 0 °C. After stirring at room temperature overnight the mixture was diluted with cyclohexane (200 ml) and dry HCl gas was bubbled through the solution for 0.5 hours. After removal of the precipitate by filtration, the solvent was removed to give a mixture of the phosphine chloride and bromide in an 80% yield. This material was used without characterisation in the next step.

**1c) Preparation of (4-methoxyphenyl)<sub>2</sub>PN(isopropyl)P(4-methoxyphenyl)<sub>2</sub>**

To a solution of the crude bis(4-methoxyphenyl) phosphorus chloride (28.8 mmol calculated from crude reaction mixture) in dichloromethane (80 ml) and triethylamine (15 ml) at 0 °C was added isopropylamine (1.11 ml, 13 mmol). The reaction was stirred for 30 min after which the ice bath was removed. After stirring for a total of 14 hrs the solution was filtered to remove the triethylammonium salt by-product. The product was isolated after crystallisation from ethanol in 77 % yield.

**Example 2. Ethylene tetramerisation reaction with 5**

A solution of **5** (9.8 mg, 0.018 mmol) in toluene (10ml) was added to a solution of Cr(THF)<sub>3</sub>Cl<sub>3</sub> (5.6 mg, 0.015 mmol) in toluene (10ml). The mixture was stirred for 5 min at ambient temperature and was then transferred to a 300 ml pressure reactor (autoclave) containing a mixture of toluene (80ml) and MAO (4.5 mmol) at 40°C. The pressure reactor was charged with ethylene after which the reactor temperature was maintained at 45°C, while the ethylene pressure was kept at 45 bar. Thorough mixing was ensured throughout by mixing speeds of 1100 RPM's using a gas entraining stirrer. The reaction was terminated after 30 minutes by discontinuing the ethylene feed to the reactor and cooling the reactor to below 10°C. After releasing the excess ethylene from the autoclave, the liquid contained in the autoclave was quenched with ethanol followed by 10% hydrochloric acid in water. Nonane was added as an internal standard for the analysis of the liquid phase by GC-FID. A small sample of the organic layer was dried over anhydrous sodium sulfate and then analysed by GC-FID. The remainder of the organic layer was filtered to isolate the solid wax/polymeric products. These solid products were dried overnight in an oven at 60°C and then weighed to yield 1.0g of polyethylene. The GC analyses indicated that the reaction mixture contained 42.72 g of soluble oligomers.
